# Supplementary material for: RosBREED: bridging the chasm between discovery and application to enable DNA-informed breeding in rosaceous crops
Source: PubMed Central journal article supplement (PMC7603521; doi:10.1038/s41438-020-00398-7), 2020-11-01
Supplement: 41438_2020_398_MOESM1_ESM.pdf [file 41438_2020_398_MOESM1_ESM.pdf]

**Supplementary information** for Iezzoni et al., “RosBREED: Bridging the chasm between discovery and application to enable DNA-informed breeding in rosaceous crops”

Three PDF files are included:

**Table S1.** RosBREED 1 project participants and their role and area of expertise, international partners and area of expertise, and Advisory Panel members.

**Table S2.** RosBREED 2 project participants and their role and area of expertise, international partners and area of expertise, and Advisory Panel members.

**Table S3.** RosBREED 1 and 2 post-doctoral associates and graduate students.
