# Supplementary material for: RosBREED: bridging the chasm between discovery and application to enable DNA-informed breeding in rosaceous crops
Source: PubMed Central journal article supplement (PMC7603521; doi:10.1038/s41438-020-00398-7), 2020-11-01
Supplement: 41438_2020_398_MOESM2_ESM.pdf [file 41438_2020_398_MOESM2_ESM.pdf]

**Table S1.** RosBREED 1 project participants and their role and area of expertise, international partners and area of expertise, and Advisory Panel members.

| Participating Group         | Name                                     | Affiliation (during project involvement)                    | Role/Expertise in RosBREED                              |
|-----------------------------|------------------------------------------|-------------------------------------------------------------|---------------------------------------------------------|
| <b>Project team members</b> |                                          |                                                             |                                                         |
| Project Director (PD)       | Amy Iezzoni                              | Mich. State Univ., East Lansing, Mich.                      | PD, sour cherry demonstration breeder                   |
| Project Co-Director (Co-PD) | Cameron Peace                            | Wash. State Univ., Pullman, Wash.                           | Co-PD, Marker-Assisted Breeding Pipeline Team Leader    |
| Co-PIs & Team Leaders       | Nahla Bassil                             | USDA-ARS, Corvallis, Ore.                                   | Genotyping Team Leader                                  |
|                             | Gennaro Fazio                            | USDA-ARS, Geneva, N.Y.                                      | Breeding Information Management System Team Leader      |
| Co-PIs & Team members       | James Luby                               | Univ. of Minn., St. Paul, Minn.                             | Apple Breeding Team Leader, apple demonstration breeder |
|                             | Dorrie Main                              | Wash. State Univ., Pullman, Wash.                           | Genomics Team Leader                                    |
|                             | Cholani Weebadde                         | Mich. State Univ., East Lansing, Mich.                      | Extension Team Leader                                   |
|                             | Eric van de Weg                          | Wageningen University and Research, Wageningen, Netherlands | Pedigree-Based Analysis Team Leader                     |
|                             | Chengyan Yue                             | Univ. of Minn., St. Paul, Minn.                             | Socio-Economics Team Leader                             |
|                             | Marco Bink                               | Plant Research International, Wageningen, Netherlands       | Pedigree-Based Analysis                                 |
|                             | Susan Brown                              | Cornell Univ., Geneva, N.Y.                                 | Apple demonstration breeder                             |
|                             | David Byrne                              | Texas A&M Univ., College Station, Tex.                      | Peach demonstration breeder                             |
|                             | John R. Clark                            | Univ. of Arkansas, Fayetteville, Ark.                       | Peach demonstration breeder                             |
|                             | Carlos Crisosto                          | Univ. of Calif. – Davis, Davis, Calif.                      | Peach physiology                                        |
| Thomas Davis                | Univ. of New Hampshire, Durham, N.H.     | Strawberry demonstration breeder                            |                                                         |
| Kate Evans                  | Wash. State Univ., Wenatchee, Wash.      | Apple demonstration breeder                                 |                                                         |
| Chad Finn                   | USDA-ARS, Corvallis, Ore.                | Strawberry demonstration breeder                            |                                                         |
| Karina Gallardo             | Wash. State Univ., Puyallup, Wash.       | Socio-Economics                                             |                                                         |
| Ksenija Gasic               | Clemson Univ., Clemson, S.C.             | Peach demonstration breeder                                 |                                                         |
| Tom Gradziel                | Univ. of Calif. – Davis, Davis, Calif.   | Peach demonstration breeder                                 |                                                         |
| James Hancock               | Mich. State Univ., East Lansing, Mich.   | Strawberry demonstration breeder                            |                                                         |
| Raymond Jussaume            | Wash. State Univ., Pullman, Wash.        | Socio-Economics                                             |                                                         |
| Vicki McCracken             | Wash. State Univ., Pullman, Wash.        | Socio-Economics                                             |                                                         |
| Nnadozie Oraguzie           | Wash. State Univ., Prosser, Wash.        | Sweet cherry demonstration breeder                          |                                                         |
| Gregory Reighard            | Clemson Univ., Clemson, S.C.             | Extension                                                   |                                                         |
| Alexandra Stone             | Oregon State University, Corvallis, Ore. | Extension                                                   |                                                         |
| Dechun Wang                 | Mich. State Univ., East Lansing, Mich.   | Pedigree-Based Analysis                                     |                                                         |
| Kenong Xu                   | Cornell Univ., Geneva, N.Y.              | Extension                                                   |                                                         |

**Table S1** continued

| <b>Participating Group</b>    | <b>Name</b>                                                       | <b>Affiliation (during project involvement)</b>                 | <b>Role/Expertise in RosBREED</b>                 |
|-------------------------------|-------------------------------------------------------------------|-----------------------------------------------------------------|---------------------------------------------------|
| <b>Consultant</b>             |                                                                   |                                                                 |                                                   |
|                               | Michael Coe                                                       | Cedar Lake Research Group, Ore.                                 | Extension Evaluation                              |
| <b>International partners</b> |                                                                   |                                                                 |                                                   |
|                               | David Chagné                                                      | Plant and Food Research, New Zealand                            | Apple genetics and genomics                       |
|                               | Riccardo Velasco                                                  | Istituto Agrario San Michele all'Adige, Trento, Italy           | Apple genetics and genomics                       |
|                               | Jasper Rees                                                       | Univ. of Western Cape, Bellville, South Africa                  | Apple genetics and genomics                       |
|                               | Dan Sargent                                                       | East Malling Research, East Malling, U.K.                       | Strawberry genetics and genomics                  |
|                               | Ignazio Verde                                                     | Centro di Ricerca per la Frutticoltura, Rome, Italy             | Peach genetics and genomics                       |
|                               | Lee Meisel, Herman Silva                                          | Andres Bello Univ., Santiago, Chile                             | Sweet cherry genetics and genomics                |
|                               | Francois Laurens, Charles-Eric Durel                              | Institut National de la Recherche Agronomique, Angers, France   | Apple breeding and genetics                       |
|                               | Beatrice Denoyes-Rothan, Elisabeth Dirlewanger, Jose Quero-Garcia | Institut National de la Recherche Agronomique, Bordeaux, France | Strawberry and sweet cherry breeding and genetics |
|                               | Benedicte Quilot-Turin, Patrick Lambert, Thierry Pascal           | Institut National de la Recherche Agronomique, Avignon, France  | Peach breeding and genetics                       |

Table S1 continued

| Participating Group                        | Name               | Affiliation                                                                        |
|--------------------------------------------|--------------------|------------------------------------------------------------------------------------|
| <b>Advisory Panel members - Industry</b>   |                    |                                                                                    |
|                                            | Jim Allen          | President, New York Apple Association; Board of Trustees, US Apple Assoc.          |
|                                            | Phil Baugher       | Co-owner, Adams County Nursery                                                     |
|                                            | Henry Bierlink     | Director, Wash. Red Raspberry Commission                                           |
|                                            | Chalmers Carr III  | CEO, Titan Peach Farms, Inc.                                                       |
|                                            | Fred Cook          | National Research Dept. Manager, Driscoll's Strawberry Associates                  |
|                                            | Robert Curtis      | Senior Manager, Almond Board of Calif.                                             |
|                                            | Bill Dodd          | President, Ohio Fruit Growers Marketing Assoc.; Board of Trustees, US Apple Assoc. |
|                                            | Bruce Grim         | Director, Wash. Marketing Assoc.; Executive Director, Wash. State Hortic. Assoc.   |
|                                            | Phil Korson        | President, Cherry Marketing Institute                                              |
|                                            | Jim McFerson       | Manager, Washington Tree Fruit Research Commission                                 |
|                                            | Kevin Moffitt      | President, Pears Northwest                                                         |
|                                            | Chrislyn Particka  | Research Director, Sakuma Bros., Inc.                                              |
|                                            | Tom Stokes         | CEO, Tree Top Inc.                                                                 |
|                                            | Gary van Sickle    | Research Director, Calif. Tree Fruit Research Agreement                            |
| <b>Advisory Panel members - Extension</b>  |                    |                                                                                    |
|                                            | Jessica Goldberger | Wash. State Univ., Pullman, Wash.                                                  |
|                                            | Peter Hirst        | Purdue Univ., W. Lafayette, Ind.                                                   |
|                                            | David Karp         | Univ. of Calif. – Riverside, Riverside, Calif.                                     |
|                                            | Mercy Olmstead     | Univ. of Florida, Gainesville, Fla.                                                |
|                                            | Ron Perry          | Mich. State Univ., E. Lansing, Mich.                                               |
|                                            | Clark Seavert      | Oregon State Univ., Corvallis, Ore.                                                |
|                                            | Jamie Sherman      | Montana State Univ., Bozeman, Mont.                                                |
|                                            | Brian Sparks       | American/Western Fruit Grower                                                      |
|                                            | Chris Watkins      | Cornell Univ., Ithaca, N.Y.                                                        |
| <b>Advisory Panel members - Scientific</b> |                    |                                                                                    |
|                                            | Albert Abbott      | Clemson Univ., Clemson S.C.                                                        |
|                                            | Pere Arús          | Institut de Recerca i Tecnologia Agroalimentàries, Cabrils, Spain                  |
|                                            | Joe Arvai          | Univ. of Mich., Ann Arbor, Mich.                                                   |
|                                            | Frederick Bliss    | Univ. of Calif. – Davis, Davis, Calif. & Seminis Vegetable Seeds, Woodland, Calif. |
|                                            | Robin Buell        | Mich. State Univ., East Lansing, Mich.                                             |
|                                            | Lailiang Cheng     | Cornell Univ., Ithaca, NY                                                          |
|                                            | Susan Gardiner     | Plant and Food Research, New Zealand                                               |
|                                            | Carolyn Ross       | Wash. State Univ., Pullman, Wash.                                                  |
|                                            | Phil Simon         | USDA-ARS, Madison, Wisc.                                                           |
