# Supplementary material for: RosBREED: bridging the chasm between discovery and application to enable DNA-informed breeding in rosaceous crops
Source: PubMed Central journal article supplement (PMC7603521; doi:10.1038/s41438-020-00398-7), 2020-11-01
Supplement: 41438_2020_398_MOESM3_ESM.pdf [file 41438_2020_398_MOESM3_ESM.pdf]

**Table S2.** RosBREED 2 project participants and their role and area of expertise, international partners and area of expertise, and Advisory Panel members.

| Participating Group         | Name            | Affiliation (during project involvement)              | Role/Expertise in RosBREED                                                          |
|-----------------------------|-----------------|-------------------------------------------------------|-------------------------------------------------------------------------------------|
| <b>Project team members</b> |                 |                                                       |                                                                                     |
| Project Director (PD)       | Amy Iezzoni     | Mich. State Univ., East Lansing, Mich.                | PD, sour cherry scion and cherry rootstock demonstration breeder                    |
| Project Co-Director (Co-PD) | Cameron Peace   |                                                       | Co-PD, DNA-Informed Breeding Team Leader, DNA Testing – apple and cherry            |
| Co-PIs & Team Leaders       | Nahla Bassil    | USDA-ARS, Corvallis, Ore.                             | DNA Testing Team Leader, DNA Testing – berry, rose, and pear                        |
|                             | Chad Finn       | USDA-ARS, Corvallis, Ore.                             | Berry Breeding Team Leader, strawberry and blackberry demonstration breeder         |
|                             | Ksenija Gasic   | Clemson Univ., Clemson, S.C.                          | <i>Prunus</i> Breeding Team Leader, peach scion and rootstock demonstration breeder |
|                             | Stan Hokanson   | Univ. of Minn., St. Paul, Minn.                       | Rose Breeding Team Leader, Rose demonstration breeder                               |
|                             | James Luby      | Univ. of Minn., St. Paul, Minn.                       | Pome Fruit Team Leader, Apple demonstration breeder                                 |
|                             | Dorrie Main     | Wash. State Univ., Pullman, Wash.                     | Data Management Team Leader                                                         |
|                             | Jim McFerson    | Wash. State Univ., Wenatchee, Wash.                   | Extension Team Leader                                                               |
|                             | Jay Norelli     | USDA-ARS, Kearneysville, WV                           | Pathology Team Leader, Apple demonstration breeder                                  |
|                             | Mercy Olmstead  | Univ. of Florida, Gainesville, Fla.                   | Extension Team Leader                                                               |
|                             | Vance Whitaker  | Univ. of Florida, Wimauma, Fla.                       | Statistic Genetics Team Leader, Strawberry demonstration breeder                    |
| Co-PIs & Team members       | Chengyan Yue    | Univ. of Minn., St. Paul, Minn.                       | Socio-Economics Team Leader                                                         |
|                             | Richard Bell    | USDA-ARS, Kearneysville, WV                           | Pear demonstration breeder                                                          |
|                             | Rex Bernardo    | Univ. of Minn., St. Paul, Minn.                       | Statistical Genetics                                                                |
|                             | Marco Bink      | Plant Research International, Wageningen, Netherlands | Pedigree-Based Analysis                                                             |
|                             | Susan Brown     | Cornell Univ., Geneva, NY                             | Apple demonstration breeder                                                         |
|                             | David Byrne     | Texas A&M Univ., College Station, Tex.                | Peach demonstration breeder                                                         |
|                             | John R. Clark   | Univ. of Arkansas, Fayetteville, Ark.                 | Peach demonstration breeder                                                         |
|                             | Matt Clark      | Univ. of Minn., St. Paul, Minn.                       | Pathology – apple                                                                   |
|                             | Carlos Crisosto | Univ. of Calif. – Davis, Davis, Calif.                | Peach standardized phenotyping training                                             |
|                             | Thomas Davis    | Univ. of New Hampshire, Durham, N.H.                  | Strawberry demonstration breeder                                                    |

Table S2 continued

| Participating Group                | Name                | Affiliation (during project involvement)               | Role/Expertise in RosBREED                            |
|------------------------------------|---------------------|--------------------------------------------------------|-------------------------------------------------------|
| <b>Project team members cont'd</b> |                     |                                                        |                                                       |
| Co-PIs & Team members<br>cont'd    | Lisa Wasko DeVetter | Wash. State Univ., Puyallup, Wash.                     | Extension – small fruit                               |
|                                    | Patrick Edger       | Mich. State Univ., East Lansing, Mich.                 | Strawberry genomics and demonstration breeder         |
|                                    | Kate Evans          | Wash. State Univ., Wenatchee, Wash.                    | Apple demonstration breeder                           |
|                                    | Karina Gallardo     | Wash. State Univ., Puyallup, Wash.                     | Socio-Economics (interim Socio-Economics Team Leader) |
|                                    | Tom Gradziel        | Univ. of Calif. – Davis, Davis, Calif.                 | Peach demonstration breeder                           |
|                                    | James Hancock       | Mich. State Univ., East Lansing, Mich.                 | Strawberry demonstration breeder                      |
|                                    | Craig Hardner       | Univ. of Queensland, Australia                         | Statistical Genetics                                  |
|                                    | Kelly Ivors         | Calif. Poly. State Univ., San Luis Obispo, Calif.      | Pathology – strawberry                                |
|                                    | Amy Lawton-Rauh     | Clemson Univ., Clemson SC                              | Statistical Genetics, genome evolution                |
|                                    | Desmond Layne       | Wash. State Univ., Pullman, Wash                       | Extension                                             |
|                                    | Lise Mahoney        | Univ. of New Hampshire, Durham, N.H.                   | Strawberry demonstration breeder                      |
|                                    | Per McCord          | Wash. State Univ., Prosser, Wash.                      | Sweet cherry demonstration breeder                    |
|                                    | Vicki McCracken     | Wash. State Univ., Pullman, Wash.                      | Socio-Economics                                       |
|                                    | Nnadozie Oraguzie   | Wash. State Univ., Prosser, Wash.                      | Sweet cherry demonstration breeder                    |
|                                    | Gregory Reighard    | Clemson Univ., Clemson, S.C.                           | Extension – tree fruit                                |
|                                    | Chris Saski         | Clemson Univ., Clemson, S.C                            | DNA Testing – <i>Prunus</i>                           |
|                                    | Guido Schnabel      | Clemson Univ., Clemson, S.C                            | Pathology                                             |
|                                    | Eric van de Weg     | Wageningen Univ. and Research, Wageningen, Netherlands | Pedigree-Based Analysis                               |
| <b>Breeder collaborators</b>       |                     |                                                        |                                                       |
|                                    | Bill Shane          | Mich. State Univ., Benton Harbor, Mich.                | Peach breeder                                         |
|                                    | Patrick Moore       | Wash. State Univ., Puyallup, Wash.                     | Strawberry breeder                                    |
| <b>Consultant</b>                  |                     |                                                        |                                                       |
|                                    | Michael Coe         | Cedar Lake Research Group, Ore.                        | Extension Evaluation                                  |

Table S2 continued

| Participating Group           | Name                                                             | Affiliation (during project involvement)                                 | Role/Expertise in RosBREED                                              |
|-------------------------------|------------------------------------------------------------------|--------------------------------------------------------------------------|-------------------------------------------------------------------------|
| <b>International partners</b> |                                                                  |                                                                          |                                                                         |
|                               | David Chagné                                                     | Plant and Food Research, New Zealand                                     | Apple genetics and genomics                                             |
|                               | Riccardo Velasco                                                 | Istituto Agrario San Michele all'Adige, Trento, Italy                    | Apple genetics and genomics                                             |
|                               | Jasper Rees                                                      | Univ. of Western Cape, Bellville, South Africa                           | Apple genetics and genomics                                             |
|                               | Richard Harrison, Felicidad Fernandez                            | East Malling Research, East Malling, U.K.                                | Strawberry genetics and genomics; cherry and pear breeding and genetics |
|                               | Ignazio Verde                                                    | Centro di Ricerca per la Frutticoltura, Rome, Italy                      | Peach genetics and genomics                                             |
|                               | Lee Meisel, Herman Silva                                         | Univ. of Chile., Santiago, Chile                                         | Peach, strawberry, sweet cherry genetics and genomics                   |
|                               | Francois Laurens, Charles-Eric Durel                             | Institut National de la Recherche Agronomique, Angers, France            | Apple breeding and genetics                                             |
|                               | Beatrice Denoyes-Rothan, Elisabeth Dirlwanger, Jose Quero-Garcia | Institut National de la Recherche Agronomique, Bordeaux, France          | Strawberry and sweet cherry breeding and genetics                       |
|                               | Benedicte Quilot-Turin, Patrick Lambert, Thierry Pascal          | Institut National de la Recherche Agronomique, Avignon, France           | Peach breeding and genetics                                             |
|                               | Thomas Debener                                                   | Leibniz Univ., Hannover, Germany                                         | Rose genetics and genomics                                              |
|                               | Pere Arús, Amparo Monfort                                        | Institute de Recerca i Tecnologia Agroalimentàries, Cabrils, Spain       | Peach and strawberry genetics and genomics                              |
|                               | Iraida Amaya                                                     | Instituto de Investigación y Formación Agraria y Pesquera, Málaga, Spain | Strawberry breeding, genetics, and genomics                             |

Table S2 continued

| Participating Group                        | Name              | Affiliation                                                                        |
|--------------------------------------------|-------------------|------------------------------------------------------------------------------------|
| <b>Advisory Panel members - Industry</b>   |                   |                                                                                    |
|                                            | Jim Allen         | President, New York Apple Association; Board of Trustees, US Apple Assoc.          |
|                                            | Jen Baugher       | Marketing Associate, Adams County Nursery                                          |
|                                            | Chalmers Carr III | CEO, Titan Peach Farms, Inc.                                                       |
|                                            | Robert Curtis     | Director, Agricultural Affairs, Almond Board of California                         |
|                                            | Bill Dodd         | President, Ohio Fruit Growers Marketing Assoc.; Board of Trustees, US Apple Assoc. |
|                                            | Carlos Fear       | Director of Consumer Lab and Molecular Genetics, Driscoll's Strawberry Associates  |
|                                            | Bob Gix           | Horticulturalist, Blue Star Growers                                                |
|                                            | Bruce Grim        | Director, Wash. Marketing Assoc.; Executive Director, Wash. State Hortic. Society  |
|                                            | Cynthia Haskins   | President and CEO, New York Apple Assoc.                                           |
|                                            | Phil Korson       | President, Cherry Marketing Institute                                              |
|                                            | Dan Legard        | Director, Calif. Strawberry Commission                                             |
|                                            | John Lott         | President, Bear Mountain Orchards, Aspers, Penn.                                   |
|                                            | Gabrielle Ludwig  | Director, Sustainability & Environmental Affairs, Almond Board of Calif.           |
|                                            | Mercy Olmstead    | Senior Manager, Production Research & Education Calif. Strawberry Commission       |
|                                            | Chris Pellett     | Co-owner, NewFlora LLC, Central Point, Ore.                                        |
| <b>Advisory Panel members - Extension</b>  |                   |                                                                                    |
|                                            | David Eddy        | Editor, American/Western Fruit Grower                                              |
|                                            | Peter Hirst       | Purdue Univ. West Lafayette, Ind.                                                  |
|                                            | David Karp        | Univ. of Calif. – Riverside, Riverside, Calif.                                     |
|                                            | Ron Perry         | Mich. State Univ., East Lansing, Mich.                                             |
|                                            | Clark Seavert     | Oregon State Univ., Corvallis, Ore.                                                |
|                                            | Chris Watkins     | Cornell Univ., Ithaca, N.Y.                                                        |
| <b>Advisory Panel members - Scientific</b> |                   |                                                                                    |
|                                            | Pere Arús         | Institut de Recerca i Tecnologia Agroalimentàries, Cabrils, Spain                  |
|                                            | Joe Arvai         | Univ. of Mich., Ann Arbor, Mich.                                                   |
|                                            | Frederick Bliss   | Univ. of Calif. – Davis, Davis, Calif. & Seminis Vegetable Seeds, Woodland, Calif. |
|                                            | Robin Buell       | Mich. State Univ., East Lansing, Mich.                                             |
|                                            | Lailiang Cheng    | Cornell Univ., Ithaca, N.Y.                                                        |
|                                            | Susan Gardiner    | Plant and Food Research, New Zealand                                               |
|                                            | Kim Hummer        | USDA-ARS, Corvallis, Ore.                                                          |
|                                            | Dan Kluepfel      | Univ. of Calif. – Davis, Davis, Calif.                                             |
|                                            | Brad Rickard      | Cornell Univ., Ithaca, N.Y.                                                        |
|                                            | Carolyn Ross      | Wash. State Univ., Pullman, Wash.                                                  |
|                                            | Phil Simon        | USDA-ARS, Madison, Wisc.                                                           |
