# Supplementary material for: RosBREED: bridging the chasm between discovery and application to enable DNA-informed breeding in rosaceous crops
Source: PubMed Central journal article supplement (PMC7603521; doi:10.1038/s41438-020-00398-7), 2020-11-01
Supplement: 41438_2020_398_MOESM4_ESM.pdf [file 41438_2020_398_MOESM4_ESM.pdf]

**Table S3.** RosBREED 1 and 2 post-doctoral associates and graduate students.

| <b>Name</b>                     | <b>RosBREED Advisor(s)</b>          | <b>Institution(s)</b>         |
|---------------------------------|-------------------------------------|-------------------------------|
| <b>Post-doctoral associates</b> |                                     |                               |
| Laima Antanaviciute             | Ksenija Gasic                       | Clemson Univ.                 |
| Lichun Cai                      | Amy Iezzoni                         | Mich. State Univ.             |
| Cassia Da Silva Linge           | Ksenija Gasic                       | Clemson Univ.                 |
| Mulusew Fikere                  | Craig Hardner                       | University of Queensland      |
| Jerry Hill                      | Dorrie Main, Cameron Peace          | Wash. State Univ.             |
| Lise Mahoney                    | Tom Davis                           | Univ. of New Hamp.            |
| Youngjae Oh                     | Vance Whitaker                      | Univ. of Fla.                 |
| Julia Piaskowski                | Cameron Peace                       | Wash. State Univ.             |
| Umesh Rosyara                   | Amy Iezzoni                         | Mich. State Univ.             |
| Sushan Ru                       | Dorrie Main                         | Wash. State Univ.             |
| Stijn Vanderzande               | Cameron Peace                       | Wash. State Univ.             |
| Sujeet Verma                    | Vance Whitaker                      | Univ. of Fla                  |
| Nan Yang                        | R. Karina Gallardo, Vicki McCracken | Wash. State Univ.             |
| Ping Zheng                      | Dorrie Main                         | Wash. State Univ.             |
| Laura Ziems                     | Craig Hardner                       | University of Queensland      |
| Jason Zurn                      | Nahla Bassil                        | USDA-ARS, Corvallis           |
| <b>Graduate students</b>        |                                     |                               |
| Kristen Andersen                | Amy Iezzoni                         | Mich. State Univ.             |
| Nita Basundari                  | Amy Iezzoni                         | Mich. State Univ.             |
| Elisabeth Blissett              | Rex Bernardo, Jim Luby              | Univ. of Minn.                |
| Jong Choi                       | Chengyan Yue                        | Univ. of Minn.                |
| Matt Clark                      | Jim Luby                            | Univ. of Minn.                |
| Jonathan Fresnedo-Ramirez       | Tom Gradziel                        | Univ. of Calif. – Davis       |
| Terrence Frett                  | Ksenija Gasic / John Clark          | Clemson Univ. / Univ. of Ark. |
| Wanfang Fu                      | Ksenija Gasic                       | Clemson Univ.                 |
| Yingzhu Guan                    | Kate Evans                          | Wash. State Univ.             |
| Julia Harshman                  | Kate Evans                          | Wash. State Univ.             |
| Nicholas Howard                 | Jim Luby                            | Univ. of Minn.                |
| Tymon James                     | Cameron Peace                       | Wash. State Univ.             |
| Alexandra Johnson               | Cameron Peace                       | Wash. State Univ.             |
| Stella Kang                     | David Byrne                         | Texas A&M Univ.               |
| Sarah Kostick                   | Kate Evans                          | Wash. State Univ.             |
| Huixin Li                       | Vicki McCracken, R. Karina Gallardo | Wash. State Univ.             |
| Yingzi Li                       | Vicki McCracken, R. Karina Gallardo | Wash. State Univ.             |
| Zongyu Li                       | Vicki McCracken, R. Karina Gallardo | Wash. State Univ.             |
| Lise Mahoney                    | Tom Davis                           | Univ. of New Hamp.            |
| Ben Orcheski                    | Susan Brown                         | Cornell Univ.                 |
| Zena Rawandoozi                 | David Byrne                         | Texas A&M Univ.               |
| Kathleen Rhoades                | Amy Iezzoni                         | Mich. State Univ.             |
| Lilian Carrillo Rodriguez       | Vicki McCracken, R. Karina Gallardo | Wash. State Univ.             |
| Sushan Ru                       | Dorrie Main, Cameron Peace          | Wash. State Univ.             |
| Alejandra Salgado               | John Clark                          | Univ. of Ark.                 |

**Table S3** continued

| <b>Name</b>         | <b>RosBREED Advisor(s)</b>       | <b>Institution(s)</b>               |
|---------------------|----------------------------------|-------------------------------------|
| Natalia Salinas     | Nahla Bassil / Vance Whitaker    | USDA-ARS, Corvallis / Univ. of Fla. |
| Paul Sandefur       | John Clark / Cameron Peace       | Univ. of Ark. / Wash. State Univ.   |
| Alexander Schaller  | Cameron Peace                    | Wash. State Univ.                   |
| Cari Schmitz-Carley | Jim Luby                         | Univ. of Minn.                      |
| Travis Stegmeir     | Amy Iezzoni                      | Mich. State Univ.                   |
| John Tillman        | Jim Luby                         | Univ. of Minn.                      |
| Sujeet Verma        | Cameron Peace                    | Wash. State Univ.                   |
| Jingjing Wang       | Chengyan Yue                     | Univ. of Minn.                      |
| Seth Wannemuehler   | Chengyan Yue                     | Univ. of Minn.                      |
| Muqing Yan          | Dave Byrne                       | Texas A&M Univ.                     |
| Melinda Yin         | John Clark, Margaret Worthington | Univ. of Ark.                       |
| Ellen Young         | David Byrne                      | Texas A&M Univ.                     |
| Shuoli Zhao         | Chengyan Yue                     | Univ. of Minn.                      |
| Yunyang Zhao        | Nnadozie Oraguzie                | Wash. State Univ.                   |
| Quijie Zheng        | Vicki McCracken                  | Wash. State Univ.                   |
| Ruchen Zhou         | Chengyan Yue                     | Univ. of Minn.                      |
